# Supplementary material for: Explorative Assessment of the Temperature–Mortality Association to Support Health-Based Heat-Warning Thresholds: A National Case-Crossover Study in Switzerland
Source: MDPI journal article supplement (doi:10.3390/ijerph20064958), 2023-03-11
Supplement: s1 [file s1]

# Supplementary Materials

## **Explorative assessment of the temperature–mortality association to support health-based heat-warning thresholds: A national case-crossover study in Switzerland**

Martina S. Ragettli<sup>1,2</sup>, Apolline Saucy<sup>1,2,3</sup>, Benjamin Flückiger<sup>1,2</sup>, Danielle Vienneau<sup>1,2</sup>, Kees de Hoogh<sup>1,2</sup>, Ana M. Vicedo-Cabrera<sup>4,5</sup>, Christian Schindler<sup>1,2</sup>, Martin Röösli<sup>1,2</sup>

<sup>1</sup> Swiss Tropical and Public Health Institute (SwissTPH), Allschwil, Switzerland

<sup>2</sup> University of Basel, Basel, Switzerland

<sup>3</sup> Barcelona Institute for Global Health (ISGlobal), Barcelona, Spain

<sup>4</sup> Institute of Social and Preventive Medicine (ISPM), University of Bern, Bern, Switzerland

<sup>5</sup> Oeschger Center for Climate Change Research (OCCR), University of Bern, Bern, Switzerland.

**Figure S1.** Map of Switzerland showing the seven regions.

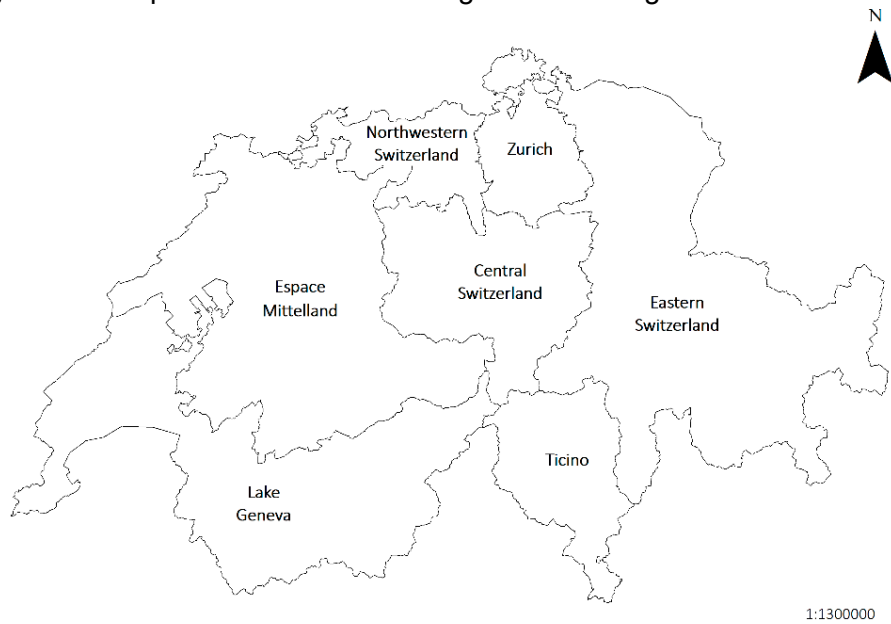

Boundaries: Swisstopo (2020), swissBOUNDARIES3D (accessed 03 February 2020).

**Figure S2.** Odds ratios (ORs) of mortality associated with daily mean (Tmean), daily maximum (Tmax), and daily minimum (Tmin) temperature in Switzerland during the warm season (May–September) for two age categories. Plots in the first row show the cumulative exposure–response association with 95% confidence interval over one week (lags 0-7). Plots in the second row show the lag-specific ORs with 95% confidence intervals at the 98<sup>th</sup> percentile of the warm-season temperature distribution in respect of the median warm-season temperature.

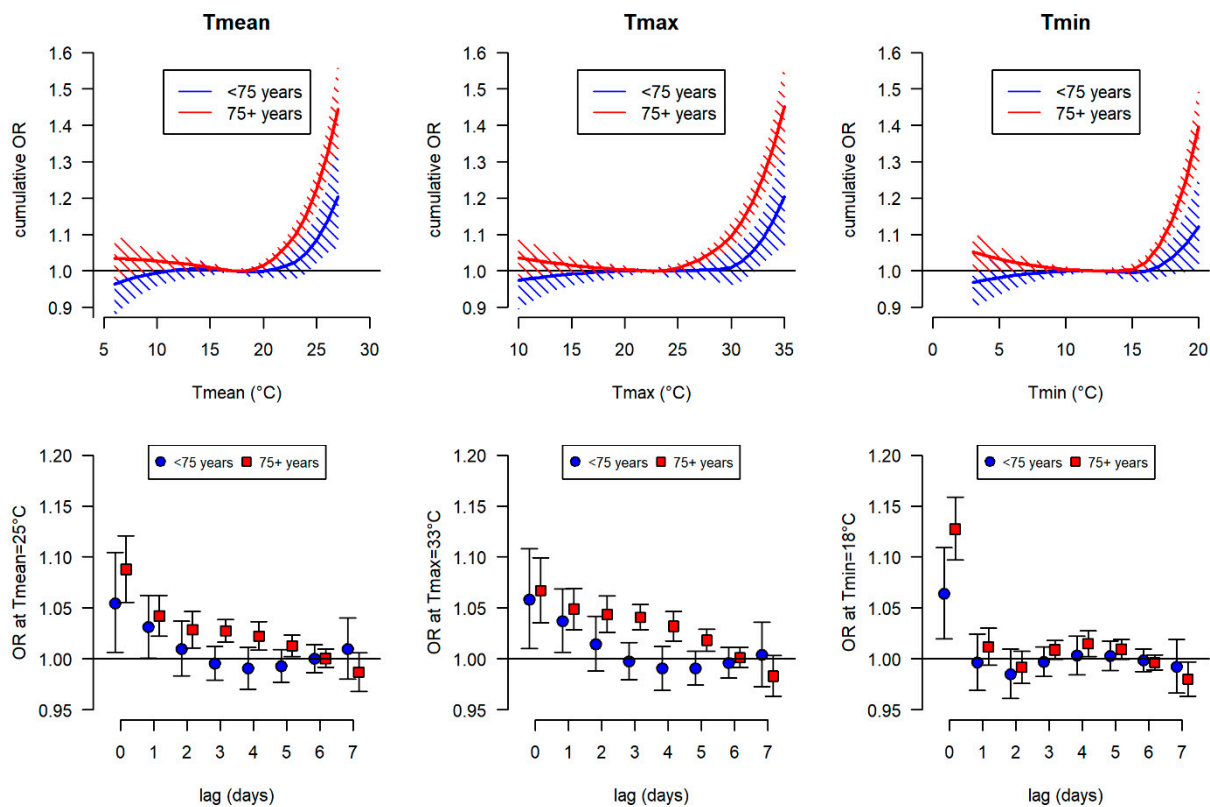

**Figure S3. Odds ratios (ORs) of mortality with 95% confidence interval associated with daily mean (Tmean), daily maximum (Tmax), and daily minimum (Tmin) temperature in Switzerland during the warm season (May–September) of two time periods (2004–2009 and 2010–2016). The year 2003 was excluded from the analyses.**

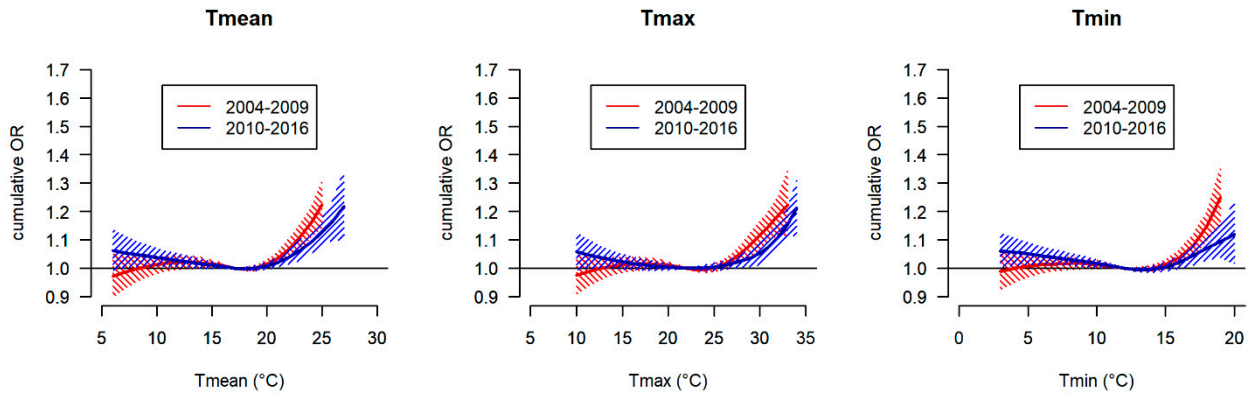

**Figure S4: Forest plot of region-specific Odds Ratios (ORs) of mortality associated with various daily mean temperature (Tmean) thresholds in Switzerland.** ORs are reported for a cumulative 7-day lag and are estimated based on overall (i.e., using the overall median Tmean as reference) model parameters. Threshold temperatures are shown as absolute values and as percentile (P) corresponding to the temperature distribution of the warm season in Switzerland between 2003 and 2016.

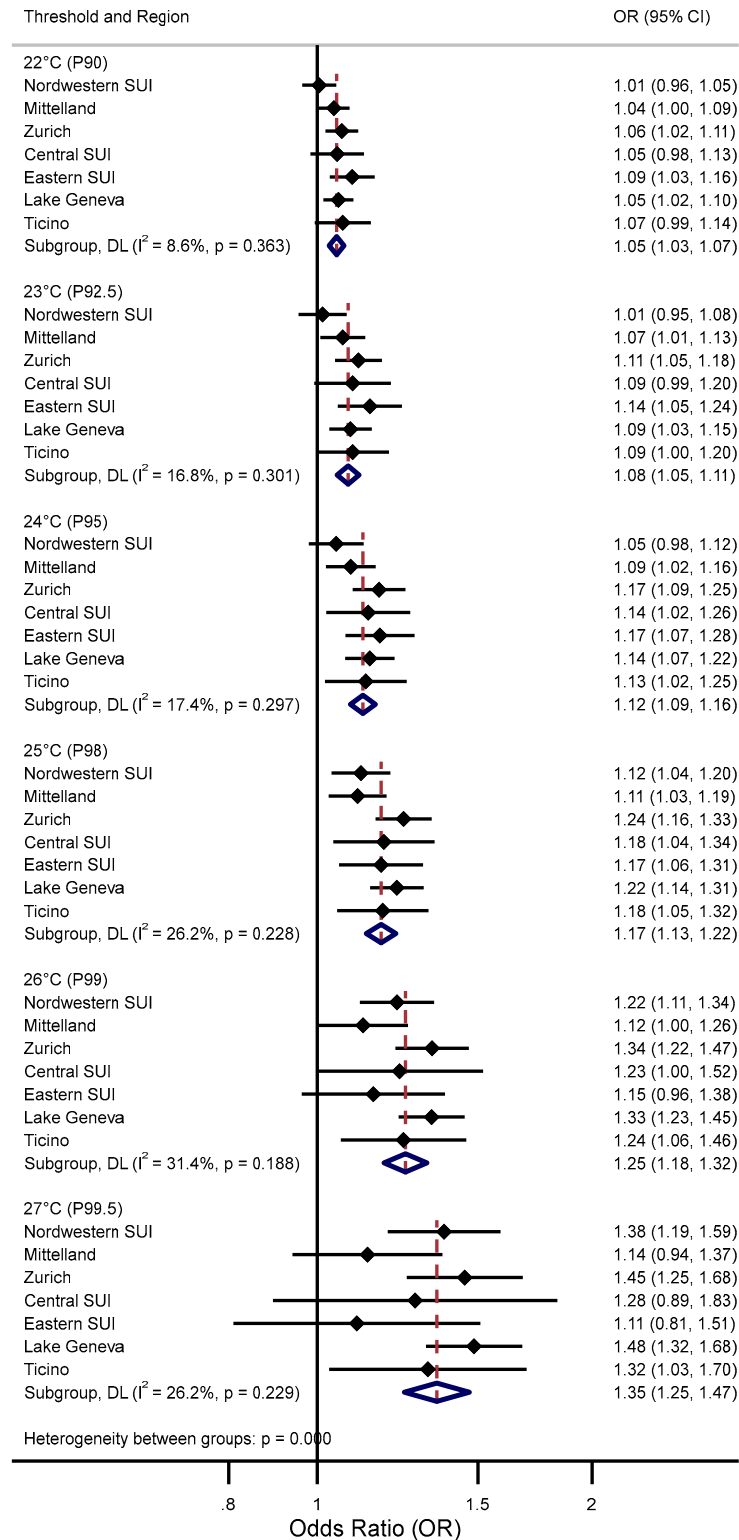

**Figure S5: Estimates of cumulative odds ratios (ORs) of mortality at various daily mean temperature (Tmean) thresholds with respect to median warm-season Tmean in Switzerland and the seven regions during 2003-2016.** ORs are reported for a cumulative 7-day lag and are estimated based on overall (i.e., using the overall median Tmean as reference) and region-specific model parameters (i.e., using the region-specific median Tmean as reference). Percentiles (P) of threshold temperatures refer to the Tmean distribution across total Switzerland.

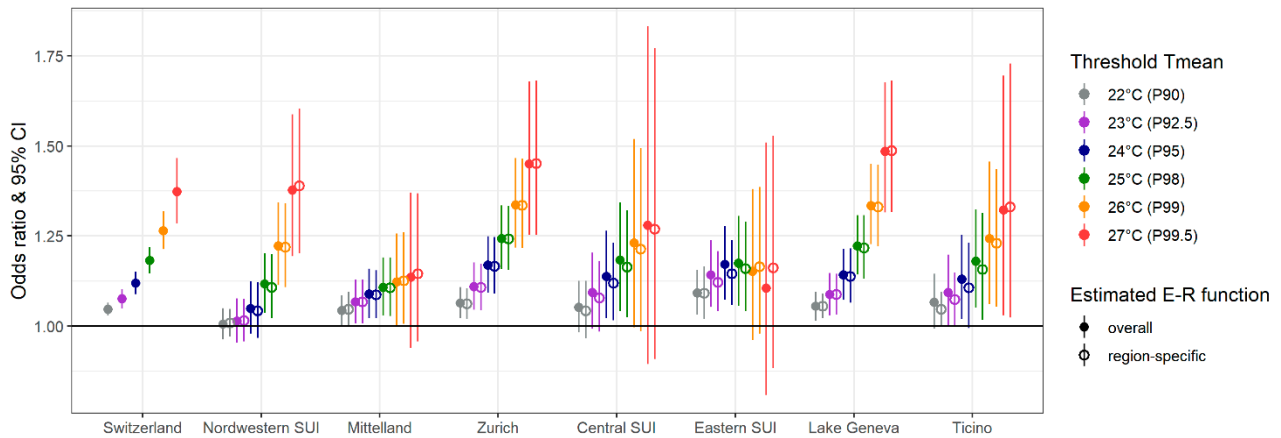

**Table S1. Cumulative Odds Ratios of mortality over 0-7 days for various temperature (T) thresholds of daily mean (Tmean), daily maximum (Tmax), and daily minimum (Tmin) temperature in relation to the respective median of the warm-season temperature distribution. ORs are shown for the total population and two age groups.**

|                  | Temperature threshold | Tmean          |                   | Tmax           |                   | Tmin           |                   |
|------------------|-----------------------|----------------|-------------------|----------------|-------------------|----------------|-------------------|
|                  | Percentile (P)        | rounded T (°C) | OR (95% CI)       | rounded T (°C) | OR (95% CI)       | rounded T (°C) | OR (95% CI)       |
| total population | P90                   | 22             | 1.05 (1.03; 1.07) | 29             | 1.05 (1.03; 1.07) | 17             | 1.05 (1.03; 1.07) |
| <75 years        |                       |                | 1.01 (0.98; 1.04) |                | 1.00 (0.97; 1.04) |                | 1.01 (0.98; 1.05) |
| 75+ years        |                       |                | 1.06 (1.04; 1.08) |                | 1.07 (1.04; 1.09) |                | 1.07 (1.05; 1.09) |
| total population | P92.5                 | 23             | 1.08 (1.05; 1.10) | 30             | 1.07 (1.04; 1.10) | 17*            | 1.05 (1.03; 1.07) |
| <75 years        |                       |                | 1.02 (0.98; 1.07) |                | 1.01 (0.96; 1.06) |                | 1.01 (0.98; 1.05) |
| 75+ years        |                       |                | 1.10 (1.07; 1.13) |                | 1.10 (1.06; 1.13) |                | 1.07 (1.05; 1.09) |
| total population | P95                   | 24             | 1.12 (1.09; 1.15) | 31             | 1.10 (1.07; 1.13) | 18             | 1.11 (1.08; 1.14) |
| <75 years        |                       |                | 1.05 (0.99; 1.10) |                | 1.03 (0.97; 1.08) |                | 1.04 (0.99; 1.09) |
| 75+ years        |                       |                | 1.15 (1.11; 1.19) |                | 1.14 (1.10; 1.17) |                | 1.14 (1.11; 1.17) |
| total population | P98                   | 25             | 1.18 (1.15; 1.22) | 33             | 1.21 (1.17; 1.25) | 18**           | 1.11 (1.08; 1.14) |
| <75 years        |                       |                | 1.08 (1.02; 1.15) |                | 1.09 (1.02; 1.16) |                | 1.04 (0.99; 1.09) |
| 75+ years        |                       |                | 1.22 (1.18; 1.27) |                | 1.26 (1.21; 1.31) |                | 1.14 (1.11; 1.17) |
| total population | P99                   | 26             | 1.26 (1.21; 1.32) | 34             | 1.28 (1.23; 1.34) | 19             | 1.20 (1.15; 1.24) |
| <75 years        |                       |                | 1.14 (1.05; 1.23) |                | 1.14 (1.05; 1.24) |                | 1.07 (1.00; 1.15) |
| 75+ years        |                       |                | 1.32 (1.26; 1.39) |                | 1.34 (1.28; 1.42) |                | 1.25 (1.19; 1.31) |
| total population | P99.5                 | 27             | 1.37 (1.29; 1.47) | 35             | 1.38 (1.29; 1.47) | 20             | 1.31 (1.24; 1.39) |
| <75 years        |                       |                | 1.20 (1.07; 1.36) |                | 1.20 (1.07; 1.35) |                | 1.12 (1.00; 1.25) |
| 75+ years        |                       |                | 1.45 (1.34; 1.56) |                | 1.45 (1.35; 1.56) |                | 1.40 (1.30; 1.50) |

\*same rounded value as P90, \*\*same rounded value as P95

**Table S2. Cumulative Odds Ratios (ORs) over 0-7 days associated with various temperatures of daily mean (Tmean), daily maximum (Tmax), and daily minimum (Tmin) temperature in the overall study period (2003-2016, May to September) and during early (May to July) and late (August-September) summer in relation to the median of the warm-season temperature distribution (Tmean: 17 °C; Tmax: 22 °C; Tmin: 12 °C).**

|         | Temperature<br>Threshold | Tmean             |                   | Tmax              |                   | Tmin              |                   |
|---------|--------------------------|-------------------|-------------------|-------------------|-------------------|-------------------|-------------------|
|         | Percentile (P)           | rounded T<br>(°C) | OR (95% CI)       | rounded T<br>(°C) | OR (95% CI)       | rounded T<br>(°C) | OR (95% CI)       |
| overall | P90                      | 22                | 1.05 (1.03; 1.07) | 29                | 1.05 (1.03; 1.07) | 17                | 1.05 (1.03; 1.07) |
| May-Jul |                          |                   | 1.06 (1.04; 1.09) |                   | 1.06 (1.03; 1.09) |                   | 1.10 (1.07; 1.14) |
| Aug-Sep |                          |                   | 1.02 (0.99; 1.05) |                   | 1.02 (0.99; 1.05) |                   | 1.02 (0.98; 1.06) |
| overall | P92.5                    | 23                | 1.08 (1.05; 1.10) | 30                | 1.07 (1.04; 1.10) | 17                | 1.05 (1.03; 1.07) |
| May-Jul |                          |                   | 1.10 (1.06; 1.13) |                   | 1.09 (1.05; 1.13) |                   | 1.10 (1.07; 1.14) |
| Aug-Sep |                          |                   | 1.04 (1.00; 1.08) |                   | 1.03 (0.99; 1.08) |                   | 1.02 (0.98; 1.06) |
| overall | P95                      | 24                | 1.12 (1.09; 1.15) | 31                | 1.10 (1.07; 1.13) | 18                | 1.11 (1.08; 1.14) |
| May-Jul |                          |                   | 1.14 (1.10; 1.19) |                   | 1.12 (1.08; 1.17) |                   | 1.16 (1.12; 1.21) |
| Aug-Sep |                          |                   | 1.07 (1.03; 1.12) |                   | 1.06 (1.01; 1.11) |                   | 1.06 (1.02; 1.10) |
| overall | P98                      | 25                | 1.18 (1.15; 1.22) | 33                | 1.21 (1.17; 1.25) | 18                | 1.11 (1.08; 1.14) |
| May-Jul |                          |                   | 1.21 (1.16; 1.26) |                   | 1.24 (1.18; 1.31) |                   | 1.16 (1.12; 1.21) |
| Aug-Sep |                          |                   | 1.13 (1.08; 1.19) |                   | 1.16 (1.10; 1.22) |                   | 1.06 (1.02; 1.10) |
| overall | P99                      | 26                | 1.26 (1.21; 1.32) | 34                | 1.28 (1.23; 1.34) | 19                | 1.20 (1.15; 1.24) |
| May-Jul |                          |                   | 1.29 (1.21; 1.37) |                   | 1.33 (1.23; 1.44) |                   | 1.24 (1.17; 1.31) |
| Aug-Sep |                          |                   | 1.22 (1.15; 1.29) |                   | 1.23 (1.16; 1.31) |                   | 1.13 (1.07; 1.19) |
| overall | P99.5                    | 27                | 1.37 (1.29; 1.47) | 35                | 1.38 (1.29; 1.47) | 20                | 1.31 (1.24; 1.39) |
| May-Jul |                          |                   | 1.39 (1.25; 1.53) |                   | 1.44 (1.28; 1.62) |                   | 1.34 (1.21; 1.48) |
| Aug-Sep |                          |                   | 1.34 (1.22; 1.46) |                   | 1.33 (1.23; 1.43) |                   | 1.22 (1.12; 1.35) |

**Table S3. Cumulative Odds Ratios (ORs) over 0-7 days associated with various temperature thresholds of daily mean (Tmean), daily maximum (Tmax), and daily minimum (Tmin) temperature in the overall study period (2003-2016, n=300,295 deaths) and during 2003-2009 (n= 149,989 deaths) and 2010-2016 (n=150,306 deaths) in relation to the respective median of the warm-season temperature distribution (Tmean: 17 °C all periods; Tmax: 22 °C overall and 2010-2016, 23 °C 2003-2009; Tmin: 12 °C all periods). Significantly different ORs between time periods (2003-2009 versus 2010-2016) are shown in bold (Chi-square test, p-value <0.05). Period-specific percentiles corresponding to the given threshold temperatures are italicized.**

| Time period | Tmean                    |                |                          |              | Tmax                     |                |                          |              | Tmin                     |                  |                          |                  |
|-------------|--------------------------|----------------|--------------------------|--------------|--------------------------|----------------|--------------------------|--------------|--------------------------|------------------|--------------------------|------------------|
|             | Threshold rounded T (°C) | Percentile (P) | OR (95% CI)              | p-value      | Threshold rounded T (°C) | Percentile (P) | OR (95% CI)              | p-value      | Threshold rounded T (°C) | Percentile (P)   | OR (95% CI)              | p-value          |
| overall     | 22                       | P90            | 1.05 (1.03; 1.07)        |              | 29                       | P90            | 1.05 (1.03; 1.07)        |              | 17                       | P90              | 1.05 (1.03; 1.07)        |                  |
| 2003-2009   |                          | <i>P90</i>     | 1.06 (1.03; 1.08)        |              |                          | <i>P90</i>     | 1.07 (1.04; 1.1)         |              |                          | <i>P90</i>       | 1.08 (1.05; 1.12)        |                  |
| 2010-2016   |                          | <i>P90</i>     | 1.04 (1.01; 1.07)        | 0.304        |                          | <i>P90</i>     | 1.04 (1.01; 1.07)        | 0.159        |                          | <i>P90</i>       | 1.05 (1.01; 1.08)        | 0.127            |
| overall     | 23                       | P92.5          | 1.08 (1.05; 1.10)        |              | 30                       | P92.5          | 1.07 (1.04; 1.10)        |              | 17                       | P92.5            | 1.05 (1.03; 1.07)        |                  |
| 2003-2009   |                          | <i>P92.5</i>   | 1.10 (1.06; 1.13)        |              |                          | <i>P92.5</i>   | 1.10 (1.06; 1.14)        |              |                          | <i>P92.5</i>     | 1.08 (1.05; 1.12)        |                  |
| 2010-2016   |                          | <i>P92.5</i>   | 1.06 (1.03; 1.10)        | 0.222        |                          | <i>P92.5</i>   | 1.05 (1.01; 1.09)        | 0.122        |                          | <i>P92.5</i>     | 1.05 (1.01; 1.08)        | 0.127            |
| overall     | 24                       | P95            | 1.12 (1.09; 1.15)        |              | 31                       | P95            | 1.10 (1.07; 1.13)        |              | 18                       | P95              | 1.11 (1.08; 1.14)        |                  |
| 2003-2009   |                          | <i>P95</i>     | <b>1.15 (1.11; 1.02)</b> |              |                          | <i>P95</i>     | 1.14 (1.09; 1.19)        |              |                          | <i>P98</i>       | <b>1.16 (1.12; 1.21)</b> |                  |
| 2010-2016   |                          | <i>P95</i>     | <b>1.09 (1.05; 1.14)</b> | <b>0.049</b> |                          | <i>P95</i>     | 1.08 (1.03; 1.12)        | 0.062        |                          | <i>P95</i>       | <b>1.07 (1.03; 1.11)</b> | <b>0.003</b>     |
| overall     | 25                       | P98            | 1.18 (1.15; 1.22)        |              | 33                       | P98            | 1.21 (1.17; 1.25)        |              | 18                       | P98              | 1.11 (1.08; 1.14)        |                  |
| 2003-2009   |                          | <i>P98</i>     | <b>1.24 (1.19; 1.30)</b> |              |                          | <i>P98.5</i>   | <b>1.26 (1.20; 1.33)</b> |              |                          | <i>P98</i>       | <b>1.16 (1.12; 1.21)</b> |                  |
| 2010-2016   |                          | <i>P98</i>     | <b>1.13 (1.08; 1.18)</b> | <b>0.002</b> |                          | <i>P98</i>     | <b>1.15 (1.10; 1.22)</b> | <b>0.014</b> |                          | <i>P95</i>       | <b>1.07 (1.03; 1.11)</b> | <b>0.003</b>     |
| overall     | 26                       | P99            | 1.26 (1.21; 1.32)        |              | 34                       | P99            | 1.28 (1.23; 1.34)        |              | 19                       | P99              | 1.20 (1.15; 1.24)        |                  |
| 2003-2009   |                          | <i>P99</i>     | <b>1.36 (1.28; 1.44)</b> |              |                          | <i>P99</i>     | <b>1.35 (1.27; 1.43)</b> |              |                          | <i>P99</i>       | <b>1.29 (1.23; 1.37)</b> |                  |
| 2010-2016   |                          | <i>P99</i>     | <b>1.17 (1.10; 1.24)</b> | <b>0.001</b> |                          | <i>P99</i>     | <b>1.21 (1.12; 1.31)</b> | <b>0.032</b> |                          | <i>P99</i>       | <b>1.10 (1.04; 1.16)</b> | <b>&lt;0.001</b> |
| overall     | 27                       | P99.5          | 1.37 (1.29; 1.47)        |              | 35                       | P99.5          | 1.38 (1.29; 1.47)        |              | 20                       | P99.5            | 1.31 (1.24; 1.39)        |                  |
| 2003-2009   |                          | <i>P99.5</i>   | <b>1.51 (1.38; 1.65)</b> |              |                          | <i>P99.5</i>   | 1.45 (1.34; 1.57)        |              |                          | <i>&gt;P99.5</i> | <b>1.49 (1.35; 1.64)</b> |                  |
| 2010-2016   |                          | <i>P99.5</i>   | <b>1.22 (1.10; 1.35)</b> | <b>0.002</b> |                          | <i>P99</i>     | 1.28 (1.14; 1.45)        | 0.087        |                          | <i>P99.5</i>     | <b>1.12 (1.01; 1.23)</b> | <b>&lt;0.001</b> |

**Table S4. Cumulative Odds Ratios (ORs) over 0-7 days associated with various temperatures of daily mean (Tmean), daily maximum (Tmax), and daily minimum (Tmin) temperature during the time periods 2004-2009 and 2010-2016 in relation to the respective median of the warm-season temperature distribution (Tmean: 17 °C both periods; Tmax: 22 °C both periods; Tmin: 12 °C both periods). The year 2003 was excluded from the analyses. P-values represent the test for equality between the two time periods (Chi-square test, significance level <0.05).**

| Time period | Tmean                          |                    |                   |         | Tmax                           |                    |                   |         | Tmin                           |                    |                   |         |
|-------------|--------------------------------|--------------------|-------------------|---------|--------------------------------|--------------------|-------------------|---------|--------------------------------|--------------------|-------------------|---------|
|             | Threshold<br>Rounded T<br>(°C) | Percentile*<br>(P) | OR (95% CI)       | p-value | Threshold<br>Rounded T<br>(°C) | Percentile*<br>(P) | OR (95% CI)       | p-value | Threshold<br>Rounded T<br>(°C) | Percentile*<br>(P) | OR (95% CI)       | p-value |
| 2004-2009   | 22                             | P90                | 1.07 (1.03; 1.10) | 0.194   | 29                             | P92.5              | 1.08 (1.04; 1.13) | 0.088   | 17                             | P92.5              | 1.08 (1.04; 1.12) | 0.214   |
| 2010-2016   | 22                             | P90                | 1.04 (1.01; 1.07) |         | 29                             | P90                | 1.04 (1.01; 1.07) |         | 17                             | P90                | 1.05 (1.01; 1.08) |         |
| 2004-2009   | 23                             | P95                | 1.11 (1.06; 1.16) | 0.119   | 30                             | P95                | 1.11 (1.07; 1.17) | 0.053   | 17                             | P92.5              | 1.08 (1.04; 1.12) | 0.214   |
| 2010-2016   | 23                             | P92.5              | 1.06 (1.03; 1.10) |         | 30                             | P92.5              | 1.05 (1.01; 1.09) |         | 17                             | P90                | 1.05 (1.01; 1.08) |         |
| 2004-2009   | 24                             | P98                | 1.16 (1.11; 1.21) | 0.044   | 31                             | P98                | 1.15 (1.10; 1.20) | 0.037   | 18                             | P98                | 1.15 (1.10; 1.20) | 0.020   |
| 2010-2016   | 24                             | P95                | 1.09 (1.05; 1.14) |         | 31                             | P95                | 1.08 (1.03; 1.12) |         | 18                             | P95                | 1.07 (1.03; 1.11) |         |
| 2004-2009   | 25                             | P99                | 1.22 (1.14; 1.31) | 0.045   | 33                             | P995               | 1.22 (1.12; 1.34) | 0.286   | 18                             | P99                | 1.15 (1.10; 1.20) | 0.020   |
| 2010-2016   | 25                             | P98                | 1.13 (1.08; 1.18) |         | 33                             | P98                | 1.15 (1.10; 1.22) |         | 18                             | P98                | 1.07 (1.03; 1.11) |         |
| 2004-2009   | 26                             | **                 |                   |         | 34                             | **                 |                   |         | 19                             | P995               | 1.25 (1.15; 1.36) |         |
| 2010-2016   | 26                             | P99                | 1.17 (1.10; 1.24) |         | 34                             | P99                | 1.21 (1.12; 1.31) |         | 19                             | P99                | 1.10 (1.04; 1.16) | 0.008   |

\*period-specific percentile

\*\*corresponds to a temperature value above the 99.5<sup>th</sup> percentile

**Table S5: Description of the number of deaths and ambient daily mean temperature (Tmean), daily maximum temperature (Tmax), and daily minimum temperature (Tmin) on days of death and control event days during the warm season by time period (2003-2009, 2004-2009, 2010-2016).**

|                    | Deaths*       | Tmean (°C) |      |      |      | Tmax (°C) |      |      |      | Tmin (°C) |      |      |      |
|--------------------|---------------|------------|------|------|------|-----------|------|------|------|-----------|------|------|------|
|                    | n (%)         | p5         | p50  | p98  | p99  | p5        | p50  | p98  | p99  | p5        | p50  | p98  | p99  |
| Period 2003-2016   | 300'295 (100) | 10.1       | 17.0 | 25.0 | 25.9 | 13.8      | 22.4 | 32.5 | 33.6 | 6.0       | 12.3 | 18.4 | 19.1 |
| Period 2003-2009** | 149'989 (50)  | 10.2       | 17.1 | 24.9 | 25.7 | 14.0      | 22.5 | 32.4 | 33.7 | 5.9       | 12.4 | 18.3 | 18.9 |
| Period 2004-2009   | 127'308 (42)  | 10.1       | 16.8 | 24.0 | 24.7 | 13.8      | 22.2 | 31.2 | 32.1 | 5.9       | 12.2 | 17.9 | 18.4 |
| Period 2010-2016** | 150'306 (50)  | 10.0       | 16.9 | 25.2 | 26.0 | 13.6      | 22.3 | 32.6 | 33.6 | 6.1       | 12.2 | 18.6 | 19.3 |

P5: 5<sup>th</sup> percentile; p50: median; p98: 98<sup>th</sup> percentile; p99: 99th percentile

\*includes natural deaths of permanent residents living in Switzerland; \*\*time periods split the entire study period in two equal parts and the more recent time period is characterized by a higher heat risk awareness.

**Table S6. Odds Ratios (ORs) of mortality associated with different threshold temperatures of daily mean temperature (Tmean) in relation to the median of the warm-season temperature distribution (17 °C). Results over the total lag-period (0-7 days) are shown with and without including a heatwave variable (heatwave indicator yes/no, numeric variable of consecutive days Tmean has been above the threshold on the day of death).**

| Temperature (°C) | Percentiles (P) | Tmean & numeric variable of consecutive heatwave days on case event (dur) |                                     |             |                |             |                  |
|------------------|-----------------|---------------------------------------------------------------------------|-------------------------------------|-------------|----------------|-------------|------------------|
|                  |                 | Tmean                                                                     | Tmean & heatwave indicator (yes/no) |             |                |             |                  |
|                  |                 | Lag0-7                                                                    | Lag0-7 + 3d HW                      |             | Lag0-7 + 5d HW |             | Lag0-7 + dur*    |
|                  |                 | OR (95%CI)                                                                | OR (95%CI)                          |             | OR (95%CI)     |             | OR (95%CI)       |
| 22 vs 17         | P90 vs P50      | 1.05 (1.03;1.07)                                                          | 1.04                                | (1.02;1.06) | 1.05           | (1.03;1.06) | 1.05 (1.02;1.07) |
| 23 vs 17         | P92.5 vs P50    | 1.08 (1.05;1.10)                                                          | 1.07                                | (1.05;1.10) | 1.07           | (1.05;1.10) | 1.09 (1.06;1.12) |
| 24 vs 17         | P95 vs P50      | 1.12 (1.09;1.15)                                                          | 1.12                                | (1.09;1.15) | 1.12           | (1.09;1.15) | 1.13 (1.09;1.16) |
| 25 vs 17         | P98 vs P50      | 1.18 (1.15;1.22)                                                          | 1.19                                | (1.15;1.23) | 1.18           | (1.14;1.22) | 1.20 (1.15;1.24) |
| 26 vs 17         | P99 vs P50      | 1.26 (1.21;1.32)                                                          | 1.26                                | (1.20;1.32) | 1.27           | (1.21;1.32) | 1.26 (1.19;1.33) |
| 27 vs 17         | P99.5 vs P50    | 1.37 (1.29;1.47)                                                          | 1.36                                | (1.27;1.46) | 1.35           | (1.26;1.45) | 1.30 (1.20;1.41) |

\*modeled as p-spline

**Table S7. Number of observations by heatwave definition based on daily mean temperature (Tmean) during the study period (warm season 2003-2016) in Switzerland.**

| Def | Heatwave variable           | Heatwave definition (Tmean threshold and duration) | case event days (day of death) | case and control event days | Days of duration Mean (range)* | years of occurrence               |
|-----|-----------------------------|----------------------------------------------------|--------------------------------|-----------------------------|--------------------------------|-----------------------------------|
| 1   | HW indicator (yes/no)       | 22°C (P90) with ≥2-d duration                      | 27'665                         | 116'886                     |                                | 2003-2016                         |
| 2   | HW indicator (yes/no)       | 22°C (P90) with ≥3-d duration                      | 20'792                         | 86'979                      |                                | 2003-2016                         |
| 3   | HW indicator (yes/no)       | 22°C (P90) with ≥5-d duration                      | 12'295                         | 50'960                      |                                | 2003-2016                         |
| 4   | HW indicator (yes/no)       | 23°C (P92.5) with ≥2-d duration                    | 16'099                         | 67'195                      |                                | 2003-2016                         |
| 5   | HW indicator (yes/no)       | 23°C (P92.5) with ≥3-d duration                    | 11'122                         | 45'648                      |                                | 2003-2016                         |
| 6   | HW indicator (yes/no)       | 23°C (P92.5) with ≥5-d duration                    | 5'905                          | 23'741                      |                                | 2003-2016                         |
| 7   | HW indicator (yes/no)       | 24°C (P95) with ≥2-d duration                      | 8'565                          | 34'875                      |                                | 2003-2016                         |
| 8   | HW indicator (yes/no)       | 24°C (P95) with ≥3-d duration                      | 5'639                          | 22'542                      |                                | 2003-2016                         |
| 9   | HW indicator (yes/no)       | 24°C (P95) with ≥5-d duration                      | 2'973                          | 11'442                      |                                | 2003, 2005-2016                   |
| 10  | HW indicator (yes/no)       | 25°C (P98) with ≥2-d duration                      | 4'198                          | 16'756                      |                                | 2003-2016                         |
| 11  | HW indicator (yes/no)       | 25°C (P98) with ≥3-d duration                      | 2'760                          | 10'911                      |                                | 2003, 2005-2016                   |
| 12  | HW indicator (yes/no)       | 25°C (P98) with ≥5-d duration                      | 1'546                          | 5'860                       |                                | 2003, 2006, 2009, 2010-2013, 2015 |
| 13  | HW indicator (yes/no)       | 26°C (P99) with ≥2-d duration                      | 1'811                          | 6'988                       |                                | 2003, 2005, 2006, 2009-2016       |
| 14  | HW indicator (yes/no)       | 26°C (P99) with ≥3-d duration                      | 1'240                          | 4'659                       |                                | 2003, 2006, 2010-2015             |
| 15  | HW indicator (yes/no)       | 26°C (P98) with ≥5-d duration                      | 643                            | 2'400                       |                                | 2003, 2006, 2012, 2013, 2015      |
| 16  | HW indicator (yes/no)       | 27°C (P99.5) with ≥2-d duration                    | 689                            | 2'522                       |                                | 2003, 2006, 2013, 2015            |
| 17  | HW indicator (yes/no)       | 27°C (P99.5) with ≥3-d duration                    | 445                            | 1'612                       |                                | 2003, 2006, 2015                  |
| 18  | HW indicator (yes/no)       | 27°C (P98.5) with ≥5-d duration                    | 235                            | 790                         |                                | 2003, 2015                        |
| 19  | Numeric variable (duration) | nr of consecutive days with ≥22°C                  | 37'633                         | 160'661                     | 4.2 (1-10)                     | 2003-2016                         |
| 20  | Numeric variable (duration) | nr of consecutive days with ≥23°C                  | 23'461                         | 99'264                      | 3.8 (1-10)                     | 2003-2016                         |
| 21  | Numeric variable (duration) | nr of consecutive days with ≥24°C                  | 13'280                         | 55'248                      | 3.0 (1-10)                     | 2003-2016                         |
| 22  | Numeric variable (duration) | nr of consecutive days with ≥25°C                  | 6'715                          | 27'385                      | 3.0 (1-10)                     | 2003-2016                         |
| 23  | Numeric variable (duration) | nr of consecutive days with ≥26°C                  | 3'049                          | 12'119                      | 2.9 (1-10)                     | 2003, 2005-2016                   |
| 24  | Numeric variable (duration) | nr of consecutive days with ≥27°C                  | 1'282                          | 4'765                       | 2.6 (1-10)                     | 2003, 2005, 2006, 2012-2015       |

Tmean: Daily mean temperature; P: percentile

\*Tmean reached the threshold temperature for at least one day
